# Supplementary material for: Multi-year Downscaling Application of Online Coupled WRFCMAQover East Asia for Regional Climate and Air QualityModeling: Model Evaluation and Aerosol Direct Effects
Source: Copernicus journal article supplement (doi:10.5194/gmd-2016-261), 2016-12-07
Supplement: Supplementary file [file gmd-2016-261-AC1-supplement.pdf]

## **Executive editor**

*In my role as Executive editor of GMD, I would like to bring to your attention our Editorial version 1.1: <http://www.geosci-model-dev.net/8/3487/2015/gmd-8-3487-2015.html>.*

*This highlights some requirements of papers published in GMD, which is also available on the GMD website in the 'Manuscript Types' section:*

*[http://www.geoscientific-model-development.net/submission/manuscript\\_types.html](http://www.geoscientific-model-development.net/submission/manuscript_types.html)*

*In particular, please note that for your paper, the following requirement has not been met in the Discussions paper: "The main paper must give the model name and version number (or other unique identifier) in the title."*

*Please add the version numbers of WRF and CMAQ in the title upon your revised submission to GMD. Anyhow, the dash in WRF-CMAQ seem to be missing in the title, which is inconsistent with the rest of the article.*

**Response:** The version numbers of WRF and CMAQ have been added to the paper title. We also changed "online coupled" to "two-way coupled" in the title for accuracy (Wong et al., 2012).

## **Reference**

Wong, D. C., Pleim, J., Mathur, R., Binkowski, F., Otte, T., Gilliam, R., Pouliot, G., Xiu, A., Young, J. O., and Kang, D.: WRF-CMAQ two-way coupled system with aerosol feedback: software development and preliminary results, *Geosci. Model Dev.*, 5, 299–312, doi:10.5194/gmd-5-299-2012, 2012.
